# Supplementary material for: Expression Pattern of Myelin-Related Apolipoprotein D in Human Multiple Sclerosis Lesions
Source: PubMed Central journal article supplement (PMC6110904; doi:10.3389/fnagi.2018.00254), 2018-08-21
Supplement: Image_1.pdf [file Image_1.pdf]

## Supplementary Figure 1

### Crystallin/GFAP

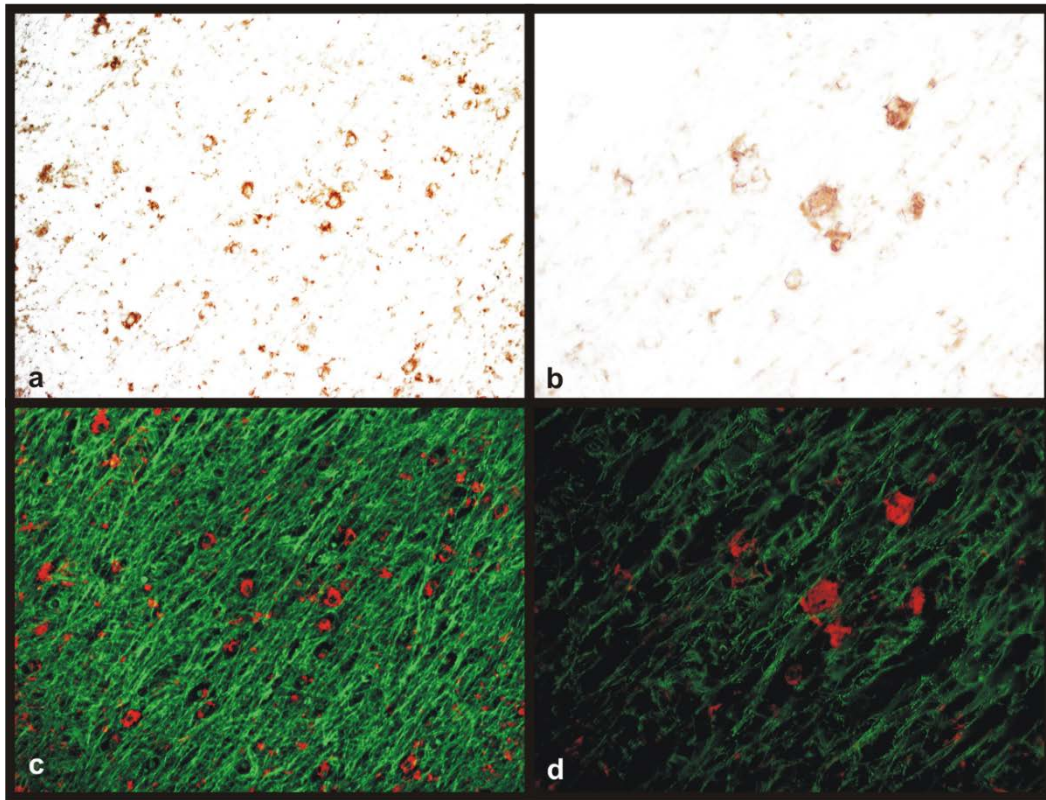

**Supplementary Figure 1.** Double immunohistochemical technique for crystallin (DAB signal, brown) and GFAP (Cy2 fluorescence signal, green). Representative images a, b show the bright-field micrographs of crystallin signal and images c, d show the digital superposition, on those section, of fluorescence signal for GFAP in green and for crystallin in red. Images a, c: 40x. Images b, d: 100x.
